# Supplementary material for: CRISPR analysis suggests that small circular single-stranded DNA smacoviruses infect Archaea instead of humans
Source: PubMed Central journal article supplement (PMC6336856; doi:10.1038/s41467-018-08167-w), 2019-01-17
Supplement: 41467_2018_8167_MOESM1_ESM.pdf [file 41467_2018_8167_MOESM1_ESM.pdf]

## Supplementary Information

"CRISPR analysis suggests that small circular single-stranded DNA smacoviruses infect *Archaea* instead of humans"

Díez-Villaseñor et al.

Supplementary Table 1. Representatives of best matches in smacoviruses to spacers in *Ca. M. intestinalis*.

| Spacer            | Target genome | Gene <sup>a</sup> | Identity | E-value               | Upstream <sup>b</sup> | Downstream <sup>c</sup> | Alignment <sup>d</sup>                                                                          |
|-------------------|---------------|-------------------|----------|-----------------------|-----------------------|-------------------------|-------------------------------------------------------------------------------------------------|
| sp1               | KP264968      | -                 | 88.9     | 4.7·10 <sup>-10</sup> | AACCC <u>TT</u> CGA   | CGCTCGAGAG              | 36 tactatatactcttggattcgttcagctcagagccgc 1<br>307 tactatatactcttggattcgttcagctcagagccgc 342     |
| sp6               | KP233175      | -                 | 100      | 2.1·10 <sup>-17</sup> | AGGCAC <u>CC</u> T    | TAGCCAGACC              | 3/ tcattccggaagcggcattttgocctatacagctcct 1<br>1515 tcattccggaagcggcattttgocctatacagctcct 1551   |
| sp7               | KP233178      | cap               | 91.7     | 1.3·10 <sup>-11</sup> | CGATCCT <u>CC</u> A   | TAGTCTAAAC              | 36 caggatgggttttagacgtgagtgctcctttgtat 1<br>772 caaagatggttttagacgtgagtgctcctttgtat 807         |
| sp8               | KP264968      | -                 | 86.5     | 7.3·10 <sup>-8</sup>  | ACGCATC <u>CC</u> A   | TTAOCAGCCA              | 36 tggctcgtgggtactcttctgatgc-tggtatatactct 1<br>283 tactcctcgtgggtactctcga-cgctactatactct 318   |
| sp9               | KP233174      | rep               | 100      | 2.1·10 <sup>-17</sup> | CCCCGTG <u>C</u> AA   | GAGTATAAAG              | 3/ tccgtagcgtccacacgctccttctgctgtttcgtta 1<br>1897 tccgtagcgtccacacgctccttctgctgtttcgtta 1933   |
| sp12              | KP233178      | rep               | 89.2     | 1.3·10 <sup>-10</sup> | GCCTAGT <u>C</u> CT   | CAAGAAGTAT              | 3/ gtatgtttcctcttagactgttatatactcctaccctt 1<br>2411 gtaattttcctcttagactgttatatactcctaccctt 2447 |
| sp19              | KP264966      | cap               | 85.7     | 5·10 <sup>-8</sup>    | ATTCTC <u>AC</u> CT   | AGTACTGGCA              | 3b ctgcccctcgtatccacactgactcagttatgagcc 1<br>546 ctcccctcgtatccacactgactcagttatgagcc 580        |
| sp20              | KP233178      | rep               | 100      | 2.1·10 <sup>-17</sup> | CGTAAGC <u>CC</u> CA  | GTGATTATGT              | 3/ cttcctttagaacatagtcaaaaattcttacaatgtgt 1<br>2204 cttcctttagaacatagtcaaaaattcttacaatgtgt 2240 |
| sp21              | KP233178      | -                 | 94.4     | 2.9·10 <sup>-13</sup> | CGAA <u>AC</u> CCCA   | TTACCAGCCA              | 36 tattgctcgttctactctcagatactgttatatactgc 1<br>277 tactcctcgttctactctcagatactgttatatactgc 312   |
| sp22 <sup>e</sup> | KP233175      | -                 | 90.5     | 1.5·10 <sup>-2</sup>  |                       |                         | 1 ctgtcagactgatacggctcg 21<br>1490 ctgactgactgatacggctcg 1510                                   |
| sp23              | KP233184      | rep               | 100      | 2.1·10 <sup>-17</sup> | AGACAGT <u>CC</u> A   | ACTTATTGTC              | 3/ cgtactttggatactcattttgtaaaaaaacaactct 1<br>1785 cgtactttggatactcattttgtaaaaaaacaactct 1821   |
| sp24              | KP233186      | cap               | 100      | 2.1·10 <sup>-17</sup> | GTAGAC <u>CC</u> CA   | TGGTGAGGAT              | 1 gagaccaatttaaccagactgtttagaatcaccaa 3/<br>604 gagaccaatttaaccagactgtttagaatcaccaa 640         |
| sp25              | KP233181      | rep               | 100      | 8.6·10 <sup>-17</sup> | ACGCTAT <u>CC</u> G   | AGACCTGAAA              | 36 actaagtgtgttccacaggtttaaactgagatatt 1<br>2126 actaagtgtgttccacaggtttaaactgagatatt 2161       |
| sp26              | KP233178      | cap               | 77.8     | 1.3·10 <sup>-4</sup>  | CTATTAT <u>CT</u> A   | TTAAGTTGCC              | 36 atggagttccttctcgggttttctcctattgagt 1<br>1304 atggagttccttctcgggttttctcctattgagt 1339         |
| sp27              | KP233179      | cap               | 89.2     | 1.3·10 <sup>-10</sup> | TAGA <u>ACT</u> CCT   | CCTACAAGAC              | 1 cccgaagtgtatcttcttactgtatgttctacctcgtg 3/<br>1099 cccgaagtgtatcttcttactgtatgttctacctcgtg 1135 |
| sp32 <sup>e</sup> | KC545227      | rep               | 85.7     | 5.9·10 <sup>-3</sup>  |                       |                         | 29 agacgagtgctgcct-atttggaaaca 3<br>2250 agatgagtgctgcct-atttggaaaca 2276                       |
| sp35              | KY086298      | rep               | 80.6     | 3.1·10 <sup>-5</sup>  | TGCACTA <u>CC</u>     | CTCCTCTTAT              | 36 taaaaatattggtaattgcaatacatatcctaaaag 1<br>677 taaaggcttggtaattgcaatacatatcctaaaag 710        |
| sp36              | KP264968      | cap/-             | 75.6     | 4.8·10 <sup>-4</sup>  | TGAGAC <u>CC</u> G    | TGCATGGAGT              | 1 tggcgtgtattacaagg-acg---tgagcttgtgaaa 36<br>1360 tggcgtgtattacaagg-acg---tgagcttgtgaaa 1400   |
| sp41              | KP233178      | cap               | 88.9     | 4.7·10 <sup>-10</sup> | TGCTGT <u>CC</u> G    | TTCCCGGCT               | 1 ttatactggagaattggcagttatcagagataat 36<br>802 ttatactggagaattggcagttatcagagataat 837           |
| sp48              | KY086298      | rep               | 88.9     | 4.7·10 <sup>-10</sup> | CATAATC <u>CC</u> CA  | GTTTATCTTG              | 36 atacctgaagctcatgtagaagaagcaacagactca 1<br>226 atacctgaagctcatgtagaagaagcaacagactca 261       |
| sp49 <sup>e</sup> | KT600068      | cap               | 83.9     | 10 <sup>-3</sup>      |                       |                         | 28 gattatggtt--gcctg-tattgataccatgg 1<br>655 gcttggttatgctcctgattgataccatgg 685                 |
| sp56              | KY086298      | rep               | 82.5     | 9.3·10 <sup>-7</sup>  | AGGGAC <u>CC</u> CA   | GAAGGGTTAA              | 1 aaagaaatcatacaatgggttcacagcag-ttataaaaa 39<br>505 aaagaaatcatacaatgggttcacagcag-ttataaaaa 543 |
| sp67              | KP233178      | cap               | 83.8     | 1.1·10 <sup>-7</sup>  | AGGCTC <u>AC</u> CA   | TTGGGTC AAC             | 3/ gtgacatgttcaaccctggcttctgctcagataacgaa 1<br>626 qdcaatgttcaaccctggcttctgctcagataacgaa 662    |
| sp69 <sup>e</sup> | KC545226      | -                 | 85.2     | 1.2·10 <sup>-3</sup>  |                       |                         | 36 tagtctttatataatttggtttcatt 10<br>2501 ttgtctttatataatttggtttcatt 2527                        |
| sp72              | KY086298      | rep               | 80.6     | 7.3·10 <sup>-6</sup>  | ATATAC <u>CC</u> CT   | TCTACATGAG              | 36 agaagcaacagactcttgggaatatagaagaaaga 1<br>246 agaagcaatqacacacatggattatqaaqaaaaqa 281         |
| sp74              | KC545226      | cap               | 77.8     | 1.3·10 <sup>-4</sup>  | ATTGGT <u>G</u> CCCT  | TATGCGACAG              | 1 tctctactctgctgtagactcactcgttttgagt 36<br>663 gcaagtactttgctgtagactcactcgttttgagt 698          |
| sp79              | KM573770      | rep               | 75       | 6.2·10 <sup>-3</sup>  | TAACGAC <u>AC</u> G   | ATGGTATCAG              | 1 cccaatattcgcgcgcaactgttccgacagggccag 36<br>301 cccaatattcgcgcgcaactgttccgacagggccag 335       |

<sup>a</sup> Intergenic sequences are indicated by a minus sign (-).

<sup>b,c</sup> Adjacent region in the subject next to a local-global alignment. Upstream and downstream refer to transcription of crRNA. Correspondence with PAM sequence is underlined.

<sup>d</sup> In the alignments the spacer sequence is represented above.

<sup>e</sup> Local alignment. The entire length of the spacer is not included.

Supplementary Table 2. *Methanomassiliicoccales* sequences where CRISPR have been sought.

| Accessions                      | Description                                                                               |
|---------------------------------|-------------------------------------------------------------------------------------------|
| CP002916.1                      | Thermoplasmatales archaeon BRNA1, complete genome                                         |
| CP004049.1                      | Candidatus Methanomethylophilus alvus Mx1201, complete genome                             |
| NC_020913.1                     | Candidatus Methanomethylophilus alvus Mx1201, complete genome                             |
| CP005934.1                      | Candidatus Methanomassiliicoccus intestinalis Issoire-Mx1, complete genome                |
| NC_021353.1                     | Candidatus Methanomassiliicoccus intestinalis Issoire-Mx1, complete genome                |
| CP010070.1                      | Candidatus Methanoplasma termitum strain MpT1, complete genome                            |
| NZ_CP010070.1                   | Candidatus Methanoplasma termitum strain MpT1, complete genome                            |
| CP013703.1                      | Methanogenic archaeon mixed culture ISO4-G1, complete genome                              |
| CP014214.1                      | Methanogenic archaeon ISO4-H5 chromosome, complete genome                                 |
| NZ_CP014214.1                   | Methanogenic archaeon ISO4-H5 chromosome, complete genome                                 |
| LJJKK00000000.1                 | Methanomassiliicoccales archaeon RumEn M1, whole genome shotgun sequencing project        |
| LJJKK01000001-LJJKK01000182     | Methanomassiliicoccales archaeon RumEn M1, whole genome shotgun sequence contigs          |
| LJKL01000001-LJKL01000018       | Methanomassiliicoccales archaeon RumEn M2, whole genome shotgun sequence contigs          |
| CAJE01000001-CAJE01000026       | Methanomassiliicoccus luminyensis B10 WGS whole genome shotgun sequence contigs           |
| NZ_CAJE00000001-NZ_CAJE01000026 | Methanomassiliicoccus luminyensis B10, whole genome shotgun sequence contigs              |
| LOPS01000001-LOPS01000050       | Candidatus Methanomethylophilus sp. 1R26, whole genome shotgun sequence contigs           |
| NZ_LOPS01000001-NZ_LOPS01000050 | Candidatus Methanomethylophilus sp. 1R26, whole genome shotgun sequencing project contigs |

Supplementary Table 3. Description of unambiguous CRISPR loci found in *Methanomassiliicoccales* organized by their consensuses.

| CRISPR                           | Consensus                                                                                                               | Arrays                           | Spacers                  |              |              |                                                                      |
|----------------------------------|-------------------------------------------------------------------------------------------------------------------------|----------------------------------|--------------------------|--------------|--------------|----------------------------------------------------------------------|
| Accession                        | Description                                                                                                             | Array Location                   | Repeats                  | Period*      | Dev**        | Consensus:                                                           |
| CRISPR 1                         | Consensus:"gttagaaatccatctaaactagaatgtaaat"                                                                             | 2 Arrays                         | 113 spacers (112 unique) |              |              |                                                                      |
| CP005934,<br>NC_021353           | Candidatus <i>Methanomassiliicoccus intestinalis</i> Isoire-Mx1, complete genome                                        | 930280..937791<br>940586..940756 | 112<br>3                 | 67,4<br>68   | 0,63<br>0    | gttagaaatccatctaaactagaatgtaaat<br>tttcattacattctagttagatggatttctaac |
| CRISPR 2                         | Consensus:"gtcgcacccttcacgggtgcgtggattgaaac"                                                                            | 3 Arrays                         | 130 spacers (129 unique) |              |              |                                                                      |
| CAJE01000012,<br>NZ_CAJE01000012 | <i>Methanomassiliicoccus luminyensis</i> B10 WGS project CAJE00000000 data, contig 00012, whole genome shotgun sequence | 732087..739595<br>723955..724114 | 114<br>3                 | 66,2<br>65,3 | 0,78<br>0,75 | gtcgcacccttcacgggtgcgtggattgaaac<br>tttcaatccacgcacccgtgaagggtgcgac  |
| LOPS01000002,<br>NZ_LOPS01000002 | Candidatus <i>Methanomethylophilus</i> sp. 1R26 contig_10, whole genome shotgun sequence                                | 64339..64479                     | 3                        | 66,5         | 0,5          | gtcgcacccttcacgggtgcgtggattgaaac                                     |
| LOPS01000033,<br>NZ_LOPS01000033 | Candidatus <i>Methanomethylophilus</i> sp. 1R26 contig_37, whole genome shotgun sequence                                | 7715..8616                       | 14                       | 66,9         | 0,72         | gttcaatccacgcacccgcgagggtgcgac                                       |
| CRISPR 3                         | Consensus:"ctcaaaactcattcgaatctctactctttgtagat "                                                                        | 1 Array                          | 53 spacers (53 unique)   |              |              |                                                                      |
| CP010070,<br>NZ_CP010070         | Candidatus <i>Methanoplasma termitum</i> strain MpT1, complete genome                                                   | 1021325..1024609                 | 54                       | 61,3         | 0,66         | ctcaaaactcattcgaatctctactctttgtagat                                  |
| CRISPR 4                         | Consensus:"gagttccccacgcatgtgggatgaaccg"                                                                                | 1 Array                          | 33 spacers (33 unique)   |              |              |                                                                      |
| CP014214                         | Methanogenic archaeon ISO4-H5 chromosome, complete genome                                                               | 1154017..1156049                 | 34                       | 60,97        | 0,06         | gagttccccacgcatgtgggatgaaccg                                         |
| CRISPR 5                         | Consensus:"atctacactagtagaaattctgaatgagtttagac"                                                                         | 1 Array                          | 47 spacers (43 unique)   |              |              |                                                                      |
| CP004049,<br>NC_020913           | Candidatus <i>Methanomethylophilus alvus</i> Mx1201, complete genome                                                    | 867719..870703                   | 48                       | 62,7         | 1,04         | atctacactagtagaaattctgaatgagtttagac                                  |
| CRISPR 6                         | Consensus:"gtttgagagtgtgtcaaatcagagtaactcaatc"                                                                          | 1 Array                          | 6 spacers (6 unique)     |              |              |                                                                      |
| CP002916                         | Thermoplasmatales archaeon BRNA1, complete genome                                                                       | 675993..676425                   | 7                        | 66,2         | 0,28         | gtttgagagtgtgtcaaatcagagtaactcaatc                                   |
| CRISPR 7                         | Consensus:"cgcttccaaggctgcacctccctgacgtccatcac"                                                                         | 1 Array                          | 5 spacers (5 unique)     |              |              |                                                                      |
| LJKK01000086                     | <i>Methanomassiliicoccales</i> archaeon RumEn M1 contig00032, whole genome shotgun sequence                             | 11338..11718                     | 6                        | 69           | 0            | cgcttccaaggctgcacctccctgacgtccatcac                                  |

\* Period is the distance (nt) between the same base in consecutive repetitions

\*\* Dev is the absolute deviation of period across the array.

Supplementary Table 4. Sequences of *Smacoviridae* analysed in this work\*.

| Accession | Description                                                                           |
|-----------|---------------------------------------------------------------------------------------|
| GQ351272  | Chimpanzee stool associated circular ssDNA virus isolate DP152, complete genome       |
| GQ351273  | Chimpanzee stool associated circular ssDNA virus isolate GM495, complete genome       |
| GQ351274  | Chimpanzee stool associated circular ssDNA virus isolate GM476, complete genome       |
| GQ351275  | Chimpanzee stool associated circular ssDNA virus isolate GM510, complete genome       |
| GQ351276  | Chimpanzee stool associated circular ssDNA virus isolate GM488, complete genome       |
| GQ351277  | Chimpanzee stool associated circular ssDNA virus isolate GM415, complete genome       |
| JN634851  | Circoviridae bovine stool/BK/KOR/2011 isolate CP11-49-3, complete genome              |
| JX274036  | Porcine stool-associated circular virus isolate Cass, complete genome                 |
| KC545226  | Porcine stool-associated circular virus 2 isolate f, complete genome                  |
| KC545227  | Porcine stool-associated circular virus 3 isolate 3L7, complete genome                |
| KC545228  | Porcine stool-associated circular virus 3 isolate 4L13, complete genome               |
| KC545229  | Porcine stool-associated circular virus 3 isolate 4L5, complete genome                |
| KC545230  | Porcine stool-associated circular virus 3 isolate L2T, complete genome                |
| KF193403  | PoSCV Kor J481, complete genome                                                       |
| KF880727  | Turkey stool associated circular ssDNA virus strain TuSCV, complete genome            |
| KJ577810  | Porcine stool-associated circular virus 1 isolate DP2, complete genome                |
| KJ577811  | Porcine stool-associated circular virus 1 isolate DP3, complete genome                |
| KJ577812  | Porcine stool-associated circular virus 7 isolate EP2-A, complete genome              |
| KJ577813  | Porcine stool-associated circular virus 7 isolate EP2-B, complete genome              |
| KJ577814  | Porcine stool-associated circular virus 7 isolate EP3-C, complete genome              |
| KJ577815  | Porcine stool-associated circular virus 7 isolate EP3-D, complete genome              |
| KJ577816  | Porcine stool-associated circular virus 9 isolate FP1, complete genome                |
| KJ577817  | Porcine stool-associated circular virus 8 isolate GP2, complete genome                |
| KJ577818  | Porcine stool-associated circular virus 2 isolate TP3, complete genome                |
| KJ577819  | Porcine stool-associated circular virus 6 isolate XP1, complete genome                |
| KM573769  | Dromedary stool-associated circular ssDNA virus isolate DcSCV_c1359, complete genome  |
| KM573770  | Dromedary stool-associated circular ssDNA virus isolate DcSCV_c1072, complete genome  |
| KM573771  | Dromedary stool-associated circular ssDNA virus isolate DcSCV_c1345, complete genome  |
| KM573772  | Dromedary stool-associated circular ssDNA virus isolate DcSCV_c1378, complete genome  |
| KM573774  | Dromedary stool-associated circular ssDNA virus isolate DcSCV_c1330, complete genome  |
| KM573775  | Dromedary stool-associated circular ssDNA virus isolate DcSCV_c1358, complete genome  |
| KM598409  | Odonata-associated circular virus-21 isolate OdasCV-21-US-1679SC3-12, complete genome |
| KM598410  | Odonata-associated circular virus-5 isolate OdasCV-5-US-1683LM1-12, complete genome   |
| KP233174  | Human smacovirus 1 isolate France/8/2008/2444, complete genome                        |
| KP233175  | Human smacovirus 1 isolate France/1/2008/2610, complete genome                        |
| KP233176  | Human smacovirus 1 isolate France/8/2008/2449, complete genome                        |
| KP233177  | Human smacovirus 1 isolate France/4/2009/4265, complete genome                        |
| KP233178  | Human smacovirus 1 isolate France/1/2009/3664, complete genome                        |
| KP233179  | Human smacovirus 1 isolate France/1/2009/3663, complete genome                        |
| KP233180  | Human smacovirus 1 isolate Oregon/6/2011/GottageGrove/5A1, complete genome            |
| KP233181  | Human smacovirus 1 isolate Oregon/6/2011/GottageGrove/B3, complete genome             |
| KP233182  | Human smacovirus 1 isolate Oregon/6/2011/GottageGrove/B45, complete genome            |
| KP233183  | Human smacovirus 1 isolate Oregon/8/2011/Portland/D56, complete genome                |
| KP233184  | Human smacovirus 1 isolate Virginia/1/2012/Mecklenburg/H19, complete genome           |
| KP233185  | Human smacovirus 1 isolate Virginia/2/2012/Albemarle/5I17, complete genome            |
| KP233186  | Human smacovirus 1 isolate Virginia/2/2012/Chesapeake/J23, complete genome            |
| KP233187  | Human smacovirus 1 isolate Virginia/2/2012/Middlesex/I22, complete genome             |
| KP233188  | Human smacovirus 1 isolate Virginia/12/2011/Albemarle/G16, complete genome            |
| KP233189  | Black howler monkey smacovirus isolate SF1, complete genome                           |
| KP233190  | Chimpanzee smacovirus isolate SF2, complete genome                                    |

|          |                                                                                      |
|----------|--------------------------------------------------------------------------------------|
| KP233191 | Gorilla smacovirus isolate SF3, complete genome                                      |
| KP233192 | Gorilla smacovirus isolate SF4, complete genome                                      |
| KP233193 | Human smacovirus 1 isolate Orgeon/8/2011/Portland/D53, complete genome               |
| KP233194 | Lemur smacovirus isolate SF5, complete genome                                        |
| KP264964 | Human smacovirus 1 isolate France/2/2008/2548, complete genome                       |
| KP264965 | Human smacovirus 1 isolate France/3/2008/2623, complete genome                       |
| KP264966 | Human smacovirus 1 isolate France/12/2008/3454, complete genome                      |
| KP264967 | Human smacovirus 1 isolate France/12/2008/3454, complete genome                      |
| KP264968 | Human smacovirus 1 isolate France/3/2009/4191, complete genome                       |
| KP264969 | Human smacovirus 1 isolate France/6/2008/2871, complete genome                       |
| KP860906 | Rat stool-associated circular ssDNA virus isolate KS/11/0577, complete genome        |
| KP860907 | Rat stool-associated circular ssDNA virus isolate Mu/10/1799, complete genome        |
| KP860908 | Rat stool-associated circular ssDNA virus isolate KS/11/0582, complete genome        |
| KT600068 | Human feces smacovirus 2 strain SmaCV2, complete genome                              |
| KT600069 | Human feces smacovirus 3 strain SmaCV3, complete genome                              |
| KT862218 | Bovine faeces associated smacovirus 2 isolate 23_Fec30587_cow, complete sequence     |
| KT862219 | Sheep faeces associated smacovirus 3 isolate 47_Fec58091_sheep, complete sequence    |
| KT862220 | Sheep faeces associated smacovirus 1 isolate 47_Fec58729_sheep, complete sequence    |
| KT862221 | Sheep faeces associated smacovirus 2 isolate 47_Fec60415_sheep, complete sequence    |
| KT862222 | Bovine faeces associated smacovirus 3 isolate 48_Fec5_cow, complete sequence         |
| KT862223 | Bovine faeces associated smacovirus 1 isolate 48_Fec59973_cow, complete sequence     |
| KT862224 | Bovine faeces associated smacovirus 5 isolate 48_Fec9_cow, complete sequence         |
| KT862225 | Porcine faeces associated smacovirus 1 isolate 49_Fec25_pig, complete sequence       |
| KT862226 | Porcine stool-associated circular virus isolate 56_Coc3310_hare, complete sequence   |
| KT862227 | Porcine stool-associated circular virus isolate 59_Coc3310_possum, complete sequence |
| KT862228 | Bovine faeces associated smacovirus 4 isolate GP3_45917_cow, complete sequence       |
| KT862229 | Bovine faeces associated smacovirus 6 isolate GP3_46075_cow, complete sequence       |
| KX838317 | Human feces-associated smacovirus isolate BWA1115, complete genome                   |
| KX838318 | Human feces-associated smacovirus isolate BWA7684, complete genome                   |
| KY086298 | Chicken associated smacovirus strain RS/BR/2015/1, complete genome                   |
| KY086299 | Chicken associated smacovirus strain RS/BR/2015/4, complete genome                   |
| KY086300 | Chicken associated smacovirus strain RS/BR/2015/3, complete genome                   |
| KY086301 | Chicken associated smacovirus strain RS/BR/2015/2, complete genome                   |

\* Dataset selected from a previous paper<sup>1</sup>.

## Supplementary reference

1. Varsani, A. & Krupovic, M. Smacoviridae: a new family of animal-associated single-stranded DNA viruses. *Arch. Virol.* **163**, 2005–2015 (2018).
